# Supplementary material for: Neutralizing Antibody Titers in Hospitalized Patients with Acute Puumala Orthohantavirus Infection Do Not Associate with Disease Severity
Source: MDPI journal article supplement (doi:10.3390/v14050901), 2022-04-26
Supplement: s1 [file s1]

# High early neutralizing antibody titres in patients with acute Puumala orthohantavirus infection do not associate with reduced disease severity

Rommel Iheozor-Ejiofor<sup>1\*</sup> #, Katariina Vapalahti<sup>4</sup>, Tarja Sironen<sup>1,2</sup>, Lev Levanov<sup>1</sup>, Jussi Hepojoki<sup>1,3</sup>, Åke Lundkvist<sup>3</sup>, Satu Mäkelä<sup>7,8</sup>, Antti Vaheri<sup>1</sup>, Jukka Mustonen<sup>7,8</sup>, Alexander Plyusnin<sup>1,3</sup>, Tomas M. Strandin<sup>1\*</sup> and Olli Vapalahti<sup>1,2,4</sup>

## Supplementary materials

**Table S1.** Descriptive statistics table showing clinical and laboratory parameters of NE patients included in the study. Variable abbreviations are Dt = Overall disease duration, Df = Fever duration, FDBH = Fever days before hospitalization, eGFR = estimated glomerular filtration rate, WBC = white blood cell count, HCT = Hematocrit, TC = thrombocyte count, CRP = C-reactive protein, NAb = PUUV neutralizing antibodies, VL = PUUV viral load, IL-8 = Interleukin-8, H3 = Histone H3, cH3 = Citrullinated histone H3, MPO = Myeloperoxidase, hNE = Neutrophil elastase, FLCκ = Free light chain κ, FLCλ = Free light chain λ, MAP = mean arterial pressure, Sev(scale) = Severity scale. A) Scaled data with all missing data excluded B) the basic data.

| (A) Scaled Data Descriptive Statistics               |        |            |       |       |       |                         |           |                        |            |      |        |             |              |               |           |           |         |          |            |             |              |               |           |                             |                             |  |
|------------------------------------------------------|--------|------------|-------|-------|-------|-------------------------|-----------|------------------------|------------|------|--------|-------------|--------------|---------------|-----------|-----------|---------|----------|------------|-------------|--------------|---------------|-----------|-----------------------------|-----------------------------|--|
|                                                      | Age    | sex        | FDBH  | Df    | Dt    | WBCmax                  | HCTmin    | TCmin                  | CRPmax     | Nab  | VL     | IL8         | H3           | cH3           | MPO       | FLCκ/FLCλ | MAPmin  | SEVscore | PUUV-N-IgG | hNE         | FLCκ         | FLCλ          | Hmax      | eGFRmin                     | eGFR                        |  |
| N                                                    | Valid  | 49         | 49    | 49    | 49    | 49                      | 49        | 49                     | 49         | 49   | 49     | 49          | 49           | 49            | 49        | 49        | 49      | 49       | 49         | 49          | 49           | 49            | 49        | 49                          | 49                          |  |
| Missing                                              | 0      | 0          | 0     | 0     | 0     | 0                       | 0         | 0                      | 0          | 0    | 0      | 0           | 0            | 0             | 0         | 0         | 0       | 0        | 0          | 0           | 0            | 0             | 0         | 0                           | 0                           |  |
| Normal range                                         | NA     | NA         | NA    | NA    | NA    | 11 x 10 <sup>9</sup> /L | 0.36-0.41 | 150x10 <sup>9</sup> /L | 35.2mmol/L | NA   | NA     | 80.062ng/ml | 0.2-2.7ng/ml | 866-1887ng/ml | 4285ng/ml | 0.26-1.65 | 350mmHg | NA       | NA         | 74-413ng/ml | 0.3-19.4mg/L | 0.71-26.3mg/L | 0.45-0.48 | 30ml/min/1.73m <sup>2</sup> | 30ml/min/1.73m <sup>2</sup> |  |
| Mean                                                 | 42.74  |            | 4.57  | 8.12  | 9.63  | 11.39                   | 0.35      | 59.71                  | 97.58      | 1020 | 84.85  | 0.28        | 5.70         | 336.06        | 157.57    | 1.16      | 83.74   | 3        | 0.57       | 115.36      | 34.19        | 29.56         | 0.44      | 49.88                       | 67.53                       |  |
| Median                                               | 40.80  | 0          | 4.00  | 8.00  | 9.00  | 10.30                   | 0.36      | 53.00                  | 91.60      | 640  | 26.81  | 0.13        | 4.79         | 325.73        | 131.59    | 1.04      | 83.33   | 3        | 0.17       | 98.71       | 24.44        | 24.26         | 0.44      | 38.00                       | 73.00                       |  |
| Mode                                                 | 27.50* | 0          | 4.00  | 8.00  | 8.00  | 8.80                    | 0.36      | 35*                    | 91.60      | 640  | 0.00   | 0.00*       | 4.72         | 214.690*      | 126.490*  | 35*       | 82.00   | 2        | 0.10*      | 57.280*     | 87.02        | 24.04         | 0.44      | 5.00*                       | 7.00*                       |  |
| Range                                                | 51.10  |            | 7.00  | 11.00 | 14.00 | 18.40                   | 0.19      | 103.00                 | 250.90     | 5040 | 717.50 | 1.45        | 20.07        | 379.89        | 286.13    | 2.19      | 52.00   | 7        | 3.73       | 419.27      | 77.72        | 62.54         | 0.26      | 120.00                      | 120.00                      |  |
| Minimum                                              | 22.40  | Male = 0   | 2.00  | 4.00  | 4.00  | 5.60                    | 0.25      | 15.00                  | 15.90      | 80   | 0.00   | 0.00        | 1.16         | 214.69        | 46.04     | 0.35      | 51.33   | 0        | 0.00       | 11.84       | 9.30         | 8.80          | 0.33      | 3.00                        | 7.00                        |  |
| Maximum                                              | 73.50  | Female = 1 | 9.00  | 15.00 | 18.00 | 24.00                   | 0.44      | 118.00                 | 266.80     | 5120 | 717.50 | 1.45        | 21.23        | 594.58        | 332.17    | 2.55      | 103.33  | 7        | 3.73       | 431.11      | 87.02        | 71.34         | 0.59      | 123.00                      | 127.00                      |  |
| a. Multiple modes exist. The smallest value is shown |        |            |       |       |       |                         |           |                        |            |      |        |             |              |               |           |           |         |          |            |             |              |               |           |                             |                             |  |
| (B) Basic Data Descriptive Statistics                |        |            |       |       |       |                         |           |                        |            |      |        |             |              |               |           |           |         |          |            |             |              |               |           |                             |                             |  |
|                                                      | Age    | sex        | FDBH  | Df    | Dt    | WBCmax                  | HCTmin    | TCmin                  | CRPmax     | Nab  | VL     | IL8         | H3           | cH3           | MPO       | FLCκ/FLCλ | MAPmin  | SEVscore | PUUV-N-IgG | hNE         | FLCκ         | FLCλ          | Hmax      | eGFRmin                     | eGFR                        |  |
| N                                                    | Valid  | 116        | 116   | 116   | 114   | 114                     | 115       | 115                    | 114        | 115  | 116    | 55          | 52           | 93            | 52        | 85        | 55      | 116      | 99         | 83          | 55           | 55            | 114       | 116                         | 110                         |  |
| Missing                                              | 0      | 0          | 0     | 2     | 2     | 1                       | 1         | 2                      | 1          | 0    | 61     | 64          | 23           | 64            | 31        | 61        | 1       | 0        | 17         | 33          | 61           | 61            | 2         | 0                           | 6                           |  |
| Mean                                                 | 44.21  |            | 4.41  | 8.17  | 10.68 | 11.48                   | 0.36      | 68.80                  | 92.43      | 1082 | 77.82  | 0.27        | 6.32         | 335.83        | 135.51    | 1.16      | 84.86   | 3        | 1.01       | 148.71      | 34.04        | 29.31         | 0.44      | 49.31                       | 65.23                       |  |
| Median                                               | 41.10  | 0          | 4.00  | 8.00  | 10.00 | 10.80                   | 0.36      | 61.00                  | 80.70      | 640  | 23.88  | 0.13        | 6.75         | 322.81        | 117.39    | 1.06      | 84.87   | 3        | 1.11       | 131.80      | 24.44        | 24.28         | 0.44      | 41.00                       | 72.00                       |  |
| Mode                                                 | 27.50* | 0          | 4.00  | 8.00  | 8.00  | 8.800*                  | 0.36      | 50.00                  | 91.60      | 640  | 0.00   | 0.00*       | 4.72         | 214.690*      | 126.490*  | 35*       | 82.00*  | 2        | 0.10*      | 57.280*     | 87.02        | 24.04         | 0.44      | 7.00                        | 7.00                        |  |
| Range                                                | 55.30  |            | 14.00 | 15.00 | 17.00 | 27.30                   | 0.19      | 229.00                 | 253.30     | 5080 | 717.50 | 1.45        | 28.59        | 379.89        | 286.13    | 2.19      | 71.34   | 8        | 3.73       | 517.53      | 77.72        | 62.54         | 0.26      | 124.00                      | 124.00                      |  |
| Minimum                                              | 21.50  | Male = 0   | 1.00  | 3.00  | 4.00  | 3.90                    | 0.25      | 9.00                   | 15.90      | 40   | 0.00   | 0.00        | 1.16         | 214.69        | 46.04     | 0.35      | 49.33   | 0        | 0.00       | 11.84       | 9.30         | 8.80          | 0.33      | 3.00                        | 4.00                        |  |
| Maximum                                              | 76.80  | Female = 1 | 15.00 | 18.00 | 21.00 | 31.20                   | 0.44      | 238.00                 | 269.20     | 5120 | 717.50 | 1.45        | 29.75        | 594.58        | 332.17    | 2.55      | 120.67  | 8        | 3.73       | 529.37      | 87.02        | 71.34         | 0.59      | 127.00                      | 128.00                      |  |
| a. Multiple modes exist. The smallest value is shown |        |            |       |       |       |                         |           |                        |            |      |        |             |              |               |           |           |         |          |            |             |              |               |           |                             |                             |  |

**Table S2.** Spearman correlation table for all the variables for both basic and scaled data. For abbreviations, see Supplementary Table S1.

| Basic dataset  | Variable | Age    | sex    | DUI    | DUI2   | DUI3   | DRH      | egR(min) | egR      | WBC(max) | HCT(min) | HCT(max) | TC(min)  | CRP(max) | NAB    | IL     | IL-R   | H3     | CH3    | MPO    | NHE    | FLC    | FLC2   | FLC3   | FLC4   | FLC5     | MAP(min)   | PUUV-N-IgG | Sev(scale) |
|----------------|----------|--------|--------|--------|--------|--------|----------|----------|----------|----------|----------|----------|----------|----------|--------|--------|--------|--------|--------|--------|--------|--------|--------|--------|--------|----------|------------|------------|------------|
|                | Age      | sex    | DUI    | DUI2   | DUI3   | DRH    | egR(min) | egR      | WBC(max) | HCT(min) | HCT(max) | TC(min)  | CRP(max) | NAB      | IL     | IL-R   | H3     | CH3    | MPO    | NHE    | FLC    | FLC2   | FLC3   | FLC4   | FLC5   | MAP(min) | PUUV-N-IgG | Sev(scale) |            |
| Basic dataset  | Age      | 0.019  | 0.019  | -0.042 | 0.096  | 0.165  | -0.127   | -0.352   | 0.176    | -0.351   | -0.213   | 0.176    | -0.023   | 0.184    | -0.016 | 0.176  | -0.023 | 0.184  | -0.016 | 0.176  | -0.023 | 0.184  | -0.016 | 0.176  | -0.023 | 0.184    | -0.016     | 0.176      | -0.023     |
|                | sex      | 0.019  | 0.019  | -0.082 | 0.015  | -0.080 | 0.197    | 0.115    | -0.205   | -0.257   | -0.209   | -0.134   | -0.025   | 0.157    | 0.057  | 0.123  | -0.142 | 0.184  | 0.065  | 0.290  | -0.058 | -0.089 | 0.036  | -0.229 | -0.060 | -0.075   | -0.083     | -0.075     | -0.083     |
|                | DUI      | 0.402  | -0.082 | 0.388  | 0.523  | -0.624 | 0.537    | 0.324    | -0.535   | 0.205    | -0.047   | 0.064    | 0.045    | 0.024    | 0.026  | 0.351  | -0.039 | -0.021 | 0.453  | 0.232  | 0.252  | 0.045  | -0.047 | 0.047  | 0.175  | 0.078    | 0.175      | 0.078      | 0.175      |
|                | DUI2     | 0.096  | 0.015  | 0.388  | 0.288  | 0.265  | -0.026   | 0.054    | 0.018    | -0.133   | 0.007    | 0.013    | 0.269    | -0.041   | 0.153  | -0.177 | 0.047  | -0.023 | 0.039  | -0.020 | -0.039 | -0.056 | -0.045 | -0.102 | -0.030 | -0.100   | -0.030     | -0.100     |            |
|                | DRH      | 0.165  | -0.080 | 0.523  | 0.265  | -0.265 | -0.389   | -0.019   | -0.111   | -0.193   | 0.293    | -0.261   | 0.117    | -0.207   | -0.324 | 0.260  | -0.17  | -0.290 | 0.138  | 0.174  | 0.185  | 0.001  | 0.095  | 0.241  | 0.062  | 0.241    | 0.062      | 0.241      |            |
|                | egR(min) | -0.297 | -0.197 | -0.624 | -0.026 | -0.265 | 0.870    | 0.870    | -0.504   | -0.495   | -0.026   | 0.028    | 0.031    | -0.027   | 0.093  | 0.049  | -0.239 | 0.057  | -0.145 | -0.307 | -0.296 | -0.322 | -0.119 | -0.081 | -0.036 | -0.577   | -0.081     | -0.036     | -0.577     |
|                | egR      | -0.395 | 0.115  | -0.537 | 0.054  | -0.389 | 0.870    | 0.870    | -0.336   | 0.500    | 0.094    | -0.025   | 0.107    | -0.119   | 0.080  | 0.01   | -0.260 | 0.000  | -0.309 | -0.298 | -0.427 | -0.430 | -0.191 | -0.021 | -0.033 | -0.577   | -0.021     | -0.033     | -0.577     |
|                | WBC(max) | -0.020 | -0.205 | 0.234  | -0.018 | -0.019 | -0.504   | -0.336   | -0.225   | 0.140    | -0.342   | -0.302   | -0.040   | 0.032    | -0.040 | 0.032  | -0.040 | 0.032  | -0.040 | 0.032  | -0.040 | 0.032  | -0.040 | 0.032  | -0.040 | 0.032    | -0.040     | 0.032      | -0.040     |
|                | HCT(min) | -0.357 | -0.257 | -0.533 | -0.133 | -0.111 | 0.495    | 0.500    | -0.225   | 0.264    | 0.178    | -0.251   | -0.043   | 0.066    | 0.125  | -0.019 | 0.071  | -0.017 | -0.226 | -0.248 | -0.256 | -0.134 | 0.138  | 0.025  | -0.162 | 0.138    | 0.025      | -0.162     | 0.138      |
|                | HCT(max) | -0.020 | -0.205 | 0.234  | -0.018 | -0.019 | -0.504   | -0.336   | -0.225   | 0.140    | -0.342   | -0.302   | -0.040   | 0.032    | -0.040 | 0.032  | -0.040 | 0.032  | -0.040 | 0.032  | -0.040 | 0.032  | -0.040 | 0.032  | -0.040 | 0.032    | -0.040     | 0.032      | -0.040     |
|                | TC(min)  | 0.161  | -0.134 | -0.047 | 0.013  | 0.293  | 0.028    | -0.025   | -0.342   | 0.178    | -0.481   | -0.002   | -0.002   | -0.002   | -0.259 | -0.111 | -0.003 | -0.205 | -0.551 | -0.068 | -0.116 | -0.100 | -0.139 | -0.088 | -0.116 | -0.139   | -0.088     | -0.116     | -0.139     |
|                | CRP(max) | 0.176  | 0.025  | 0.064  | 0.269  | 0.261  | 0.031    | 0.107    | 0.032    | -0.251   | -0.082   | -0.202   | -0.082   | -0.184   | -0.033 | -0.003 | -0.164 | 0.090  | -0.049 | -0.090 | -0.049 | -0.136 | -0.064 | -0.132 | -0.172 | -0.132   | -0.172     | -0.132     | -0.172     |
|                | NAB      | -0.073 | 0.157  | 0.045  | -0.041 | 0.117  | -0.027   | -0.119   | -0.040   | -0.043   | -0.015   | 0.002    | -0.082   | -0.226   | 0.182  | -0.117 | -0.087 | -0.124 | -0.064 | -0.064 | -0.064 | -0.064 | -0.064 | -0.064 | -0.064 | -0.064   | -0.064     | -0.064     | -0.064     |
|                | IL       | 0.084  | 0.057  | 0.024  | 0.153  | -0.207 | 0.093    | 0.080    | 0.032    | 0.066    | 0.121    | -0.259   | 0.184    | -0.226   | -0.070 | 0.223  | 0.087  | 0.373  | 0.120  | 0.154  | 0.024  | 0.024  | 0.024  | 0.024  | 0.024  | 0.024    | 0.024      | 0.024      | 0.024      |
|                | IL-R     | -0.115 | -0.123 | 0.026  | -0.177 | -0.324 | 0.049    | 0.011    | 0.085    | 0.125    | 0.132    | -0.111   | -0.033   | 0.182    | -0.070 | -0.020 | -0.039 | 0.214  | 0.041  | 0.133  | 0.074  | 0.133  | 0.074  | 0.133  | 0.074  | 0.133    | 0.074      | 0.133      | 0.074      |
|                | H3       | 0.097  | -0.142 | 0.351  | 0.067  | 0.260  | -0.239   | -0.260   | 0.262    | -0.219   | 0.083    | -0.003   | -0.010   | -0.117   | 0.223  | -0.020 | 0.394  | -0.037 | 0.530  | 0.303  | 0.170  | 0.239  | 0.185  | 0.224  | 0.155  | 0.239    | 0.185      | 0.224      | 0.155      |
|                | CH3      | 0.151  | 0.184  | -0.039 | -0.023 | 0.017  | 0.057    | 0.000    | -0.064   | 0.071    | 0.176    | -0.205   | -0.164   | -0.087   | 0.087  | 0.309  | 0.394  | 0.394  | 0.216  | 0.064  | 0.195  | 0.042  | 0.183  | -0.068 | -0.117 | 0.116    | 0.116      | 0.116      | 0.116      |
|                | MPO      | -0.018 | 0.065  | -0.021 | 0.039  | -0.290 | -0.145   | -0.039   | 0.374    | 0.017    | -0.481   | -0.551   | -0.090   | -0.124   | 0.373  | 0.214  | 0.037  | 0.216  | 0.002  | 0.165  | 0.050  | 0.190  | -0.220 | -0.386 | 0.200  | -0.386   | 0.200      | -0.386     | 0.200      |
|                | NHE      | -0.290 | 0.451  | -0.002 | 0.318  | -0.012 | 0.211    | -0.226   | 0.015    | -0.069   | -0.159   | -0.069   | -0.159   | -0.069   | -0.159 | -0.069 | -0.159 | -0.069 | 0.002  | 0.100  | 0.014  | 0.014  | 0.014  | 0.014  | 0.014  | 0.014    | 0.014      | 0.014      | 0.014      |
|                | FLC      | 0.207  | -0.058 | 0.232  | -0.039 | 0.174  | -0.296   | -0.427   | 0.239    | -0.284   | 0.092    | -0.196   | -0.136   | 0.024    | 0.153  | 0.133  | 0.303  | 0.195  | 0.165  | 0.100  | 0.748  | 0.582  | 0.164  | 0.067  | 0.424  | 0.164    | 0.067      | 0.424      | 0.164      |
| FLC2           | -0.198   | -0.089 | -0.252 | -0.056 | -0.185 | -0.322 | -0.430   | 0.107    | -0.256   | 0.011    | -0.110   | -0.064   | 0.040    | -0.014   | 0.074  | 0.170  | 0.042  | 0.050  | 0.014  | 0.748  | -0.031 | -0.138 | 0.004  | 0.332  | -0.138 | 0.004    | 0.332      | -0.138     |            |
| FLC3           | 0.093    | 0.036  | 0.045  | -0.045 | 0.001  | -0.119 | -0.191   | 0.186    | -0.114   | 0.068    | -0.098   | -0.132   | -0.021   | 0.231    | 0.119  | 0.233  | 0.183  | 0.190  | 0.129  | 0.582  | -0.031 | -0.137 | 0.055  | 0.226  | -0.137 | 0.055    | 0.226      | -0.137     |            |
| FLC4           | -0.106   | -0.229 | -0.047 | -0.102 | 0.095  | -0.081 | -0.021   | -0.081   | 0.138    | -0.051   | 0.186    | -0.172   | -0.055   | -0.326   | -0.159 | -0.085 | -0.068 | -0.220 | -0.064 | -0.164 | -0.138 | -0.137 | -0.137 | -0.137 | -0.137 | -0.137   | -0.137     | -0.137     |            |
| FLC5           | -0.085   | -0.060 | 0.175  | -0.030 | 0.241  | -0.036 | -0.033   | 0.097    | 0.025    | 0.073    | 0.116    | -0.137   | -0.208   | -0.040   | 0.033  | 0.224  | -0.117 | -0.386 | 0.372  | 0.067  | 0.004  | 0.055  | 0.184  | -0.007 | 0.055  | 0.184    | -0.007     | 0.055      |            |
| MAP(min)       | -0.106   | -0.076 | -0.283 | -0.106 | 0.062  | -0.577 | -0.652   | -0.447   | -0.362   | 0.127    | -0.375   | -0.096   | -0.104   | -0.042   | -0.061 | 0.155  | 0.116  | 0.320  | 0.324  | 0.424  | 0.322  | 0.226  | 0.113  | -0.075 | 0.226  | 0.113    | -0.075     | 0.226      |            |
| Scaled dataset | Age      | -0.211 | -0.322 | -0.058 | 0.141  | -0.337 | -0.455   | -0.028   | -0.323   | -0.197   | 0.333    | -0.095   | -0.133   | 0.061    | -0.134 | 0.077  | 0.088  | -0.078 | -0.039 | 0.243  | 0.254  | 0.100  | -0.003 | -0.167 | -0.088 | 0.254    | 0.100      | -0.003     | -0.167     |
|                | sex      | -0.211 | -0.173 | -0.015 | -0.032 | 0.326  | -0.298   | -0.276   | -0.161   | -0.420   | 0.075    | -0.170   | -0.174   | 0.062    | -0.160 | -0.192 | 0.123  | -0.018 | -0.151 | -0.021 | 0.032  | -0.198 | -0.072 | -0.086 | -0.072 | -0.086   | -0.072     | -0.086     |            |
|                | DUI      | -0.122 | -0.173 | 0.257  | 0.257  | -0.738 | 0.624    | -0.683   | -0.667   | 0.063    | -0.063   | -0.063   | -0.063   | -0.063   | -0.063 | -0.063 | -0.063 | -0.063 | -0.063 | -0.063 | -0.063 | -0.063 | -0.063 | -0.063 | -0.063 | -0.063   | -0.063     | -0.063     |            |
|                | DUI2     | -0.055 | -0.015 | 0.257  | 0.173  | -0.027 | 0.153    | 0.003    | -0.087   | -0.047   | 0.115    | 0.185    | -0.237   | 0.103    | -0.223 | 0.088  | -0.034 | 0.003  | 0.024  | -0.038 | 0.027  | 0.001  | -0.364 | -0.055 | -0.364 | -0.055   | -0.364     |            |            |
|                | DRH      | -0.141 | -0.032 | -0.482 | 0.173  | -0.376 | -0.466   | 0.136    | -0.332   | -0.227   | 0.132    | -0.253   | -0.026   | -0.179   | -0.322 | 0.119  | -0.102 | -0.173 | 0.162  | 0.198  | -0.257 | -0.038 | -0.129 | 0.157  | -0.038 | -0.129   | 0.157      | 0.322      |            |
|                | egR(min) | -0.337 | -0.326 | -0.739 | -0.027 | -0.376 | 0.854    | 0.854    | -0.443   | -0.503   | -0.084   | 0.022    | 0.185    | -0.154   | 0.090  | -0.106 | -0.306 | 0.053  | -0.184 | -0.391 | -0.260 | -0.286 | -0.135 | -0.231 | -0.098 | -0.519   | -0.098     | -0.519     |            |
|                | egR      | -0.455 | 0.298  | -0.624 | 0.153  | -0.466 | 0.854    | 0.854    | -0.325   | 0.519    | 0.015    | 0.047    | 0.320    | -0.120   | 0.072  | -0.144 | -0.365 | -0.066 | -0.070 | -0.242 | -0.361 | -0.401 | -0.168 | -0.203 | -0.401 | -0.168   | -0.203     | -0.401     |            |
|                | WBC(max) | -0.028 | -0.276 | 0.403  | -0.001 | 0.136  | -0.443   | -0.325   | -0.211   | -0.211   | 0.505    | -0.374   | 0.011    | 0.186    | 0.071  | 0.104  | 0.259  | -0.409 | 0.401  | 0.301  | 0.184  | 0.304  | 0.176  | 0.037  | 0.170  | 0.044    | 0.304      | 0.176      |            |
|                | HCT(min) | -0.323 | -0.161 | -0.667 | -0.087 | -0.332 | 0.503    | 0.519    | -0.211   | -0.248   | 0.098    | 0.081    | -0.122   | 0.117    | 0.152  | -0.186 | 0.066  | -0.014 | -0.153 | -0.381 | -0.341 | -0.180 | -0.123 | -0.103 | -0.153 | -0.103   | -0.153     | -0.103     |            |
|                | HCT(max) | -0.197 | -0.420 | 0.006  | -0.047 | -0.227 | -0.084   | 0.015    | 0.505    | 0.248    | -0.096   | -0.496   | 0.125    | -0.066   | 0.143  | 0.152  | -0.247 | 0.147  | 0.507  | 0.339  | 0.039  | -0.060 | 0.057  | -0.015 | -0.060 | 0.057    | -0.015     | -0.060     |            |
|                | TC(min)  | 0.333  | 0.075  | -0.128 | 0.115  | 0.332  | 0.022    | 0.047    | -0.374   | 0.098    | -0.066   | -0.066   | -0.066   | -0.066   | -0.066 | -0.066 | -0.066 | -0.066 | -0.066 | -0.066 | -0.066 | -0.066 | -0.066 | -0.066 | -0.066 | -0.066   | -0.066     | -0.066     |            |
|                | CRP(max) | -0.095 | -0.107 | -0.066 | 0.185  | -0.253 | 0.185    | 0.320    | 0.011    | 0.081    | 0.125    | -0.061   | -0.168   | 0.130    | -0.039 | -0.039 | -0.209 | 0.101  | -0.075 | -0.149 | -0.093 | -0.098 | -0.360 | -0.222 | -0.107 | -0.360   | -0.222     | -0.107     |            |
|                | NAB      | 0.174  | 0.174  | 0.174  | 0.174  | 0.174  | 0.174    | 0.174    | 0.174    | 0.174    | 0.174    | 0.174    | 0.174    | 0.174    | 0.174  | 0.174  | 0.174  | 0.174  | 0.174  | 0.174  | 0.174  | 0.174  | 0.174  | 0.174  | 0.174  | 0.174    | 0.174      | 0.174      |            |
|                | IL       | 0.061  | 0.062  | -0.052 | 0.103  | -0.179 | 0.090    | 0.072    | 0.071    | 0.117    | -0.143   | -0.238   | 0.130    | -0.168   | -0.267 | -0.110 | 0.224  | 0.078  | 0.371  | 0.099  | 0.180  | -0.029 | 0.299  | -0.345 | -0.029 | 0.299    | -0.345     | -0.029     |            |
|                | IL-R     | -0.134 | 0.160  | -0.036 | -0.232 | -0.322 | 0.106    | 0.144    | 0.104    | -0.152   | 0.152    | -0.109   | -0.039   | -0.197   | -0.110 | -0.056 | 0.290  | 0.208  | -0.047 | 0.128  | 0.068  | 0.112  | -0.05  | -0.037 | 0.008  | -0.037   | 0.008      | -0.037     |            |
|                | H3       | 0.077  | -0.192 | 0.164  | -0.288 | 0.119  | -0.306   | -0.365   | 0.259    | -0.186   | 0.247    | -0.237   | -0.093   | -0.284   | -0.224 | -0.056 | 0.380  | 0.380  | 0.345  | 0.123  | 0.316  | 0.178  | 0.237  | -0.058 | -0.290 | 0.245    | -0.058     | -0.290     |            |
|                | CH3      | 0.088  | 0.123  | -0.073 | -0.034 | -0.012 | 0.051    | 0.006    | -0.049   | 0.066    | -0.147   | -0.168   | -0.209   | -0.106   | 0.078  | 0.290  | 0.380  | 0.198  | 0.077  | 0      |        |        |        |        |        |          |            |            |            |

**Table S3.** p-Values for the correlation for all variables for both the basic and scaled data. For abbreviations, see Supplementary Table S1.

|                | Variable | Age   | sex   | D(t)  | D(f)  | FDH   | eGR(min) | eGR   | WBC(max) | HCT(min) | HCT(max) | TC(min) | CRP(max) | Nab   | VL    | IL    | H3    | ch3   | MPO   | NNE   | FLCx  | FLCA  | FLC/FLCA | MMP(min) | PUUV-NgG | Sev(scale) |       |       |
|----------------|----------|-------|-------|-------|-------|-------|----------|-------|----------|----------|----------|---------|----------|-------|-------|-------|-------|-------|-------|-------|-------|-------|----------|----------|----------|------------|-------|-------|
| Basic dataset  | Age      | sex   | 0.841 | 0.841 | 0.000 | 0.311 | 0.079    | 0.001 | 0.000    | 0.832    | 0.000    | 0.023   | 0.088    | 0.060 | 0.437 | 0.543 | 0.153 | 0.285 | 0.873 | 0.655 | 0.129 | 0.146 | 0.500    | 0.258    | 0.401    | 0.257      |       |       |
|                | sex      |       | 0.841 | 0.385 | 0.785 | 0.397 | 0.034    | 0.233 | 0.028    | 0.006    | 0.026    | 0.154   | 0.795    | 0.092 | 0.677 | 0.386 | 0.174 | 0.191 | 0.556 | 0.008 | 0.672 | 0.519 | 0.793    | 0.014    | 0.555    | 0.416      |       |       |
|                | D(t)     |       |       | 0.000 | 0.385 | 0.000 | 0.000    | 0.000 | 0.000    | 0.000    | 0.000    | 0.795   | 0.626    | 0.501 | 0.634 | 0.864 | 0.854 | 0.001 | 0.781 | 0.851 | 0.000 | 0.088 | 0.063    | 0.743    | 0.617    | 0.084      | 0.002 |       |
|                | D(f)     |       |       | 0.311 | 0.875 | 0.000 | 0.004    | 0.784 | 0.581    | 0.846    | 0.161    | 0.942   | 0.888    | 0.004 | 0.667 | 0.244 | 0.120 | 0.658 | 0.872 | 0.723 | 0.985 | 0.776 | 0.685    | 0.745    | 0.281    | 0.771      | 0.262 |       |
|                | FDH      |       |       | 0.397 | 0.000 | 0.000 | 0.004    | 0.000 | 0.000    | 0.000    | 0.000    | 0.000   | 0.000    | 0.000 | 0.000 | 0.000 | 0.000 | 0.000 | 0.000 | 0.000 | 0.000 | 0.000 | 0.000    | 0.000    | 0.000    | 0.000      | 0.000 |       |
|                | eGR(min) |       |       | 0.001 | 0.034 | 0.000 | 0.784    | 0.004 | 0.000    | 0.000    | 0.000    | 0.000   | 0.788    | 0.766 | 0.741 | 0.774 | 0.500 | 0.728 | 0.212 | 0.687 | 0.186 | 0.005 | 0.028    | 0.116    | 0.388    | 0.932      | 0.723 |       |
|                | eGR      |       |       | 0.000 | 0.233 | 0.000 | 0.581    | 0.000 | 0.000    | 0.000    | 0.000    | 0.000   | 0.329    | 0.795 | 0.270 | 0.217 | 0.569 | 0.484 | 0.014 | 0.000 | 0.732 | 0.008 | 0.001    | 0.001    | 0.170    | 0.828      | 0.754 |       |
|                | WBC(max) |       |       | 0.832 | 0.028 | 0.000 | 0.864    | 0.840 | 0.000    | 0.000    | 0.000    | 0.016   | 0.000    | 0.000 | 0.732 | 0.763 | 0.816 | 0.554 | 0.011 | 0.650 | 0.008 | 0.058 | 0.042    | 0.439    | 0.178    | 0.393      | 0.340 |       |
|                | HCT(min) |       |       | 0.000 | 0.006 | 0.000 | 0.161    | 0.241 | 0.000    | 0.000    | 0.016    | 0.005   | 0.058    | 0.007 | 0.645 | 0.636 | 0.380 | 0.035 | 0.617 | 0.879 | 0.001 | 0.037 | 0.062    | 0.411    | 1.142    | 0.809      | 0.000 |       |
|                | HCT(max) |       |       | 0.023 | 0.026 | 0.795 | 0.842    | 0.041 | 0.788    | 0.329    | 0.000    | 0.005   | 0.000    | 0.000 | 0.383 | 0.870 | 0.384 | 0.355 | 0.427 | 0.212 | 0.000 | 0.895 | 0.506    | 0.937    | 0.628    | 0.591      | 0.477 | 0.178 |
|                | TC(min)  |       |       | 0.088 | 0.154 | 0.626 | 0.988    | 0.002 | 0.766    | 0.795    | 0.000    | 0.008   | 0.058    | 0.000 | 0.031 | 0.982 | 0.059 | 0.439 | 0.976 | 0.144 | 0.000 | 0.549 | 0.156    | 0.427    | 0.482    | 0.049      | 0.258 | 0.000 |
|                | CRP(max) |       |       | 0.047 | 0.795 | 0.501 | 0.004    | 0.005 | 0.741    | 0.270    | 0.732    | 0.007   | 0.383    | 0.031 | 0.382 | 0.183 | 0.816 | 0.921 | 0.245 | 0.413 | 0.663 | 0.326 | 0.044    | 0.341    | 0.067    | 0.001      | 0.308 |       |
|                | NAb      |       |       | 0.630 | 0.092 | 0.534 | 0.667    | 0.216 | 0.776    | 0.217    | 0.673    | 0.645   | 0.870    | 0.982 | 0.383 | 0.097 | 0.197 | 0.264 | 0.319 | 0.259 | 0.881 | 0.661 | 0.770    | 0.381    | 0.500    | 0.859      | 0.265 | 0.000 |
|                | IL       |       |       | 0.543 | 0.677 | 0.864 | 0.164    | 0.129 | 0.569    | 0.000    | 0.016    | 0.639   | 0.196    | 0.384 | 0.559 | 0.883 | 0.097 | 0.126 | 0.629 | 0.366 | 0.000 | 0.917 | 0.262    | 0.000    | 0.912    | 0.767      | 0.000 | 0.000 |
|                | ch3      |       |       | 0.415 | 0.386 | 0.854 | 0.210    | 0.019 | 0.728    | 0.484    | 0.554    | 0.380   | 0.355    | 0.439 | 0.816 | 0.197 | 0.621 | 0.821 | 0.889 | 0.027 | 0.128 | 0.772 | 0.347    | 0.602    | 0.400    | 0.261      | 0.816 | 0.667 |
|                | ch3      |       |       | 0.353 | 0.174 | 0.001 | 0.658    | 0.012 | 0.021    | 0.014    | 0.011    | 0.035   | 0.427    | 0.976 | 0.921 | 0.264 | 0.112 | 0.889 | 0.004 | 0.004 | 0.739 | 0.000 | 0.029    | 0.229    | 0.096    | 0.422      | 0.039 | 0.138 |
|                | ch3      |       |       | 0.285 | 0.191 | 0.781 | 0.872    | 0.905 | 0.687    | 1.000    | 0.650    | 0.617   | 0.212    | 0.144 | 0.245 | 0.539 | 0.538 | 0.027 | 0.004 | 0.124 | 0.652 | 0.166 | 0.767    | 0.195    | 0.634    | 0.407      | 0.413 |       |
|                | MPO      |       |       | 0.873 | 0.556 | 0.851 | 0.723    | 0.007 | 0.186    | 0.732    | 0.000    | 0.879   | 0.000    | 0.000 | 0.413 | 0.259 | 0.006 | 0.128 | 0.739 | 0.124 | 0.988 | 0.327 | 0.720    | 0.173    | 0.045    | 0.000      | 0.003 |       |
|                | hNE      |       |       | 0.655 | 0.008 | 0.000 | 0.985    | 0.004 | 0.005    | 0.008    | 0.058    | 0.041   | 0.895    | 0.549 | 0.663 | 0.681 | 0.391 | 0.772 | 0.000 | 0.652 | 0.988 | 0.476 | 0.923    | 0.356    | 0.566    | 0.001      | 0.003 |       |
| FLCx           |          |       | 0.129 | 0.672 | 0.088 | 0.776 | 0.204    | 0.028 | 0.001    | 0.082    | 0.037    | 0.506   | 0.156    | 0.326 | 0.861 | 0.264 | 0.347 | 0.029 | 0.166 | 0.237 | 0.476 | 0.000 | 0.000    | 0.263    | 0.629    | 0.001      | 0.000 |       |
| FLCA           |          |       | 0.146 | 0.519 | 0.063 | 0.281 | 0.176    | 0.016 | 0.001    | 0.439    | 0.062    | 0.937   | 0.427    | 0.644 | 0.770 | 0.917 | 0.602 | 0.229 | 0.767 | 0.720 | 0.923 | 0.000 | 0.820    | 0.314    | 0.975    | 0.036      |       |       |
| FLC/FLCA       |          |       | 0.500 | 0.793 | 0.744 | 0.465 | 0.295    | 0.000 | 0.000    | 0.000    | 0.000    | 0.000   | 0.000    | 0.000 | 0.000 | 0.000 | 0.000 | 0.000 | 0.000 | 0.000 | 0.820 | 0.914 | 0.317    | 0.667    | 0.000    | 0.000      |       |       |
| NAB(min)       |          |       | 0.258 | 0.014 | 0.617 | 0.281 | 0.319    | 0.392 | 0.828    | 0.399    | 0.342    | 0.591   | 0.490    | 0.067 | 0.560 | 0.015 | 0.261 | 0.422 | 0.634 | 0.045 | 0.566 | 0.233 | 0.114    | 0.068    | 0.268    | 0.300      | 0.000 |       |
| PUUV-NgG       |          |       | 0.401 | 0.555 | 0.084 | 0.771 | 0.017    | 0.723 | 0.754    | 0.340    | 0.809    | 0.477   | 0.258    | 0.001 | 0.039 | 0.002 | 0.816 | 0.399 | 0.407 | 0.000 | 0.001 | 0.629 | 0.975    | 0.691    | 0.068    | 0.459      |       |       |
| Sev(scale)     |          |       | 0.257 | 0.416 | 0.002 | 0.262 | 0.515    | 0.000 | 0.000    | 0.000    | 0.178    | 0.000   | 0.308    | 0.265 | 0.763 | 0.667 | 0.138 | 0.413 | 0.003 | 0.003 | 0.001 | 0.016 | 0.097    | 0.230    | 0.459    |            |       |       |
| Scaled dataset | Age      | sex   | 0.145 | 0.224 | 0.034 | 0.693 | 0.335    | 0.018 | 0.001    | 0.851    | 0.024    | 0.176   | 0.020    | 0.516 | 0.364 | 0.677 | 0.358 | 0.600 | 0.447 | 0.593 | 0.790 | 0.093 | 0.079    | 0.485    | 0.985    | 0.251      | 0.544 |       |
|                | sex      |       | 0.145 | 0.234 | 0.019 | 0.828 | 0.022    | 0.037 | 0.055    | 0.269    | 0.003    | 0.609   | 0.242    | 0.231 | 0.673 | 0.272 | 0.186 | 0.399 | 0.904 | 0.300 | 0.888 | 0.795 | 0.826    | 0.172    | 0.393    | 0.284      | 0.000 |       |
|                | D(t)     |       | 0.024 | 0.234 | 0.034 | 0.075 | 0.000    | 0.000 | 0.000    | 0.967    | 0.380    | 0.650   | 0.346    | 0.721 | 0.805 | 0.260 | 0.202 | 0.581 | 0.021 | 0.074 | 0.067 | 0.546 | 0.623    | 0.546    | 0.002    | 0.000      |       |       |
|                | D(f)     |       | 0.693 | 0.919 | 0.075 | 0.235 | 0.852    | 0.293 | 0.000    | 0.551    | 0.747    | 0.432   | 0.204    | 0.102 | 0.482 | 0.124 | 0.547 | 0.816 | 0.983 | 0.868 | 0.796 | 0.591 | 0.993    | 0.067    | 0.560    | 0.072      | 0.000 |       |
|                | FDH      |       | 0.335 | 0.828 | 0.000 | 0.235 | 0.000    | 0.001 | 0.000    | 0.351    | 0.020    | 0.117   | 0.365    | 0.079 | 0.860 | 0.220 | 0.028 | 0.417 | 0.313 | 0.235 | 0.677 | 0.192 | 0.774    | 0.794    | 0.376    | 0.282      | 0.004 |       |
|                | FDH      |       | 0.001 | 0.022 | 0.000 | 0.852 | 0.008    | 0.000 | 0.000    | 0.000    | 0.000    | 0.568   | 0.881    | 0.204 | 0.000 | 0.000 | 0.000 | 0.000 | 0.000 | 0.000 | 0.000 | 0.000 | 0.000    | 0.000    | 0.000    | 0.000      | 0.000 |       |
|                | eGR      |       | 0.001 | 0.037 | 0.000 | 0.293 | 0.001    | 0.000 | 0.000    | 0.023    | 0.000    | 0.921   | 0.746    | 0.025 | 0.410 | 0.624 | 0.123 | 0.100 | 0.966 | 0.364 | 0.094 | 0.005 | 0.004    | 0.249    | 0.162    | 0.784      | 0.000 |       |
|                | eGR      |       | 0.001 | 0.037 | 0.000 | 0.293 | 0.001    | 0.000 | 0.000    | 0.023    | 0.000    | 0.921   | 0.746    | 0.025 | 0.410 | 0.624 | 0.123 | 0.100 | 0.966 | 0.364 | 0.094 | 0.005 | 0.004    | 0.249    | 0.162    | 0.784      | 0.000 |       |
|                | WBC(max) |       | 0.851 | 0.055 | 0.004 | 1.000 | 0.351    | 0.001 | 0.023    | 0.146    | 0.000    | 0.008   | 0.941    | 0.200 | 0.627 | 0.477 | 0.072 | 0.737 | 0.004 | 0.036 | 0.204 | 0.816 | 0.226    | 0.802    | 0.243    | 0.001      | 0.000 |       |
|                | HCT(min) |       | 0.024 | 0.269 | 0.000 | 0.551 | 0.020    | 0.000 | 0.000    | 0.146    | 0.005    | 0.052   | 0.507    | 0.144 | 0.424 | 0.298 | 0.201 | 0.651 | 0.923 | 0.295 | 0.007 | 0.017 | 0.217    | 0.400    | 0.483    | 0.012      | 0.000 |       |
|                | HCT(max) |       | 0.176 | 0.003 | 0.967 | 0.747 | 0.117    | 0.568 | 0.921    | 0.000    | 0.008    | 0.005   | 0.000    | 0.393 | 0.652 | 0.327 | 0.296 | 0.088 | 0.315 | 0.000 | 0.071 | 0.814 | 0.681    | 0.700    | 0.919    | 0.680      | 0.046 |       |
|                | TC(min)  |       | 0.020 | 0.609 | 0.380 | 0.432 | 0.365    | 0.881 | 0.746    | 0.008    | 0.058    | 0.000   | 0.678    | 0.762 | 0.100 | 0.454 | 0.101 | 0.248 | 0.000 | 0.001 | 0.818 | 0.528 | 0.346    | 0.225    | 0.872    | 0.000      | 0.000 |       |
|                | CRP(max) |       | 0.516 | 0.242 | 0.650 | 0.204 | 0.079    | 0.204 | 0.025    | 0.941    | 0.579    | 0.393   | 0.678    | 0.249 | 0.373 | 0.792 | 0.525 | 0.419 | 0.490 | 0.609 | 0.308 | 0.526 | 0.501    | 0.011    | 0.126    | 0.242      | 0.000 |       |
|                | NAb      |       | 0.364 | 0.231 | 0.346 | 0.102 | 0.860    | 0.292 | 0.410    | 0.200    | 0.144    | 0.652   | 0.762    | 0.249 | 0.063 | 0.174 | 0.048 | 0.468 | 0.380 | 0.798 | 0.801 | 0.625 | 0.923    | 0.100    | 0.002    | 0.108      | 0.000 |       |
|                | IL       |       | 0.673 | 0.713 | 0.782 | 0.230 | 0.261    | 0.731 | 0.000    | 0.000    | 0.000    | 0.000   | 0.000    | 0.000 | 0.000 | 0.000 | 0.000 | 0.000 | 0.000 | 0.000 | 0.000 | 0.000 | 0.000    | 0.000    | 0.000    | 0.000      | 0.000 |       |
|                | IL       |       | 0.358 | 0.272 | 0.805 | 0.124 | 0.024    | 0.469 | 0.323    | 0.477    | 0.298    | 0.296   | 0.454    | 0.792 | 0.174 | 0.451 | 0.000 | 0.000 | 0.000 | 0.000 | 0.000 | 0.000 | 0.000    | 0.000    | 0.000    | 0.000      | 0.000 |       |
|                | H3       |       | 0.600 | 0.186 | 0.260 | 0.547 | 0.417    | 0.032 | 0.100    | 0.072    | 0.201    | 0.088   | 0.101    | 0.525 | 0.048 | 0.132 | 0.700 | 0.007 | 0.015 | 0.401 | 0.027 | 0.222 | 0.011    | 0.691    | 0.043    | 0.990      | 0.000 |       |
|                | ch3      |       | 0.547 | 0.399 | 0.620 | 0.816 | 0.933    | 0.717 | 0.966    | 0.737    | 0.651    | 0.315   | 0.248    | 0.149 | 0.468 | 0.592 | 0.043 | 0.007 | 0.173 | 0.598 | 0.139 | 0.626 | 0.244    | 0.638    | 0.598    | 0.698      | 0.000 |       |
|                | MPO      |       | 0.593 | 0.904 | 0.581 | 0.983 | 0.235    | 0.206 | 0.634    | 0.004    | 0.923    | 0.000   | 0.490    | 0.380 | 0.009 | 0.152 | 0.015 | 0.173 | 0.009 | 0.009 | 0.377 | 0.942 | 0.126    | 0.116    | 0.052    | 0.103      | 0.000 |       |
| hNE            |          | 0.790 | 0.300 | 0.021 | 0.868 | 0.267 | 0.025    | 0.094 | 0.036    | 0.295    | 0.017    | 0.009   | 0.298    | 0.498 | 0.750 | 0.401 | 0.598 | 0.009 | 0.009 | 0.453 | 0.922 | 0.382 | 0.871    | 0.299    | 0.001    | 0.000      |       |       |
| FLCx           |          | 0.093 | 0.888 | 0.074 | 0.796 | 0.172 | 0.071    | 0.005 | 0.204    | 0.007    | 0.814    | 0.181   | 0.308    | 0.801 | 0.215 | 0.381 | 0.027 | 0.139 | 0.377 | 0.453 | 0.000 | 0.000 | 0.430    | 0.842    | 0.004    | 0.000      |       |       |
| FLCA           |          | 0.079 | 0.795 | 0.667 | 0.591 | 0.074 | 0.044    | 0.    |          |          |          |         |          |       |       |       |       |       |       |       |       |       |          |          |          |            |       |       |

**Table S4.** Kruskal-Wallis test and general liner modelling (GLM) – analysis. The Kruskal-Wallis test included 4 levels of PUUV-NAb1 categories as the dependent variable (NAb≤320 = 29, NAb = 640 = 38, NAb = 1280 = 28, NAb ≥ 2560 = 21). GLM analysis was performed separately to PUUV-N-IgG1, PUUV-VL1, eGFRmin and eGFR as dependent variables. Variables of predictive significance marked in bold font.

|                |            | Kruskal-Wallis test |       |             | General linear model (GLM) analyses |                 |      |             |         |    |                 |        |             |        |    |                 |        |             |        |    |                 |      |             |       |
|----------------|------------|---------------------|-------|-------------|-------------------------------------|-----------------|------|-------------|---------|----|-----------------|--------|-------------|--------|----|-----------------|--------|-------------|--------|----|-----------------|------|-------------|-------|
|                |            | NAb                 |       |             | VL                                  | eGFR(min)       |      |             |         |    |                 |        |             | eGFR   |    |                 |        | PUUV-N-IgG  |        |    |                 |      |             |       |
| Variable       |            | DF                  | Chisq | p           | DF                                  | MS <sup>1</sup> | F    | p           | Est     | DF | MS <sup>1</sup> | F      | p           | Est    | DF | MS <sup>1</sup> | F      | p           | Est    | DF | MS <sup>1</sup> | F    | p           | Est   |
| Basic dataset  | Age        | 3                   | 3.15  | 0.37        | 1                                   | 563.16          | 0.03 | 0.87        | -0.27   | 1  | 13255.30        | 10.81  | <b>0.00</b> | -0.85  | 1  | 17392.61        | 13.44  | <b>0.00</b> | -1.00  | 1  | 1.33            | 1.99 | 0.16        | -0.01 |
|                | sex        | 3                   | 3.75  | 0.29        | 1                                   | 34518.30        | 1.67 | 0.20        | 51.14   | 1  | 4956.96         | 3.81   | 0.05        | 14.08  | 1  | 1191.49         | 0.82   | 0.37        | 7.15   | 1  | 0.03            | 0.05 | 0.83        | -0.04 |
|                | D(t)       | 3                   | 0.50  | 0.92        | 1                                   | 289.26          | 0.01 | 0.91        | -0.95   | 1  | 42888.35        | 44.72  | <b>0.00</b> | -7.17  | 1  | 27473.69        | 22.93  | <b>0.00</b> | -5.87  | 1  | 0.02            | 0.03 | 0.87        | 0.00  |
|                | D(f)       | 3                   | 0.51  | 0.92        | 1                                   | 45337.18        | 2.21 | 0.14        | 14.18   | 1  | 67.15           | 0.05   | 0.82        | -0.36  | 1  | 2601.21         | 1.81   | 0.18        | 2.25   | 1  | 0.62            | 0.91 | 0.34        | -0.04 |
|                | FDBH       | 3                   | 5.59  | 0.13        | 1                                   | 10297.89        | 0.49 | 0.49        | -10.23  | 1  | 10321.16        | 7.74   | <b>0.01</b> | -5.86  | 1  | 21320.65        | 14.74  | <b>0.00</b> | -8.79  | 1  | 2.48            | 3.67 | 0.06        | 0.10  |
|                | eGFR(min)  | 3                   | 3.75  | 0.29        | 1                                   | 7686.76         | 0.36 | 0.55        | 0.32    | 1  |                 |        |             |        | 1  | 106806.55       | 241.28 | <b>0.00</b> | 0.86   | 1  | 0.42            | 0.61 | 0.44        | 0.00  |
|                | eGFR       | 3                   | 6.67  | 0.08        | 1                                   | 9079.82         | 0.41 | 0.52        | 0.36    | 1  | 99548.05        | 241.28 | <b>0.00</b> | 0.81   | 1  |                 |        |             |        | 1  | 0.27            | 0.38 | 0.54        | 0.00  |
|                | WBC(max)   | 3                   | 0.48  | 0.92        | 1                                   | 2701.26         | 0.12 | 0.73        | -1.59   | 1  | 35639.11        | 35.67  | <b>0.00</b> | -3.70  | 1  | 26618.44        | 22.20  | <b>0.00</b> | -3.26  | 1  | 0.40            | 0.59 | 0.45        | 0.01  |
|                | HCT(min)   | 3                   | 0.66  | 0.88        | 1                                   | 9349.24         | 0.43 | 0.51        | -360.40 | 1  | 37397.55        | 38.03  | <b>0.00</b> | 458.73 | 1  | 40660.76        | 38.22  | <b>0.00</b> | 491.78 | 1  | 0.68            | 1.01 | 0.32        | 2.14  |
|                | HCT(max)   | 3                   | 1.20  | 0.75        | 1                                   | 10460.35        | 0.49 | 0.49        | -284.29 | 1  | 1558.62         | 1.21   | 0.27        | -74.23 | 1  | 3.22            | 0.00   | 0.96        | -3.52  | 1  | 0.36            | 0.53 | 0.47        | 1.18  |
|                | TC(min)    | 3                   | 7.41  | 0.06        | 1                                   | 61347.78        | 2.99 | 0.09        | -1.28   | 1  | 402.48          | 0.31   | 0.58        | 0.05   | 1  | 61.52           | 0.04   | 0.84        | -0.02  | 1  | 0.70            | 1.03 | 0.31        | 0.00  |
|                | CRP(max)   | 3                   | 7.10  | 0.07        | 1                                   | 2969.50         | 0.14 | 0.71        | 0.15    | 1  | 987.00          | 0.75   | 0.39        | -0.05  | 1  | 227.80          | 0.16   | 0.69        | 0.03   | 1  | 2.88            | 4.42 | <b>0.04</b> | 0.00  |
|                | NAb        | 3                   |       |             | 1                                   | 25601.13        | 1.23 | 0.27        | -0.02   | 1  | 368.49          | 0.27   | 0.60        | 0.00   | 1  | 6781.17         | 4.86   | <b>0.03</b> | -0.01  | 1  | 1.71            | 2.57 | 0.11        | 0.00  |
|                | VL         | 3                   | 9.17  | <b>0.03</b> | 1                                   |                 |      |             |         | 1  | 527.11          | 0.36   | 0.55        | 0.02   | 1  | 569.42          | 0.41   | 0.52        | 0.02   | 1  | 1.88            | 2.51 | 0.12        | 0.00  |
|                | IL-8       | 3                   | 1.62  | 0.65        | 1                                   | 69140.17        | 3.29 | 0.08        | -0.27   | 1  | 341.49          | 0.23   | 0.63        | 8.63   | 1  | 71.04           | 0.05   | 0.82        | 3.96   | 1  | 0.10            | 0.13 | 0.72        | 0.14  |
|                | H3         | 3                   | 1.66  | 0.65        | 1                                   | 285.52          | 0.01 | 0.91        | 0.64    | 1  | 2764.34         | 2.10   | 0.15        | -0.99  | 1  | 3071.05         | 2.08   | 0.15        | -1.06  | 1  | 1.61            | 2.42 | 0.12        | 0.03  |
|                | cH3        | 3                   | 8.15  | <b>0.04</b> | 1                                   | 5050.80         | 0.23 | 0.64        | -0.12   | 1  | 2.63            | 0.00   | 0.97        | 0.00   | 1  | 86.53           | 0.06   | 0.80        | 0.02   | 1  | 0.07            | 0.09 | 0.76        | 0.00  |
|                | MPO        | 3                   | 7.91  | <b>0.05</b> | 1                                   | 22628.83        | 1.05 | 0.31        | 0.30    | 1  | 7447.60         | 6.12   | <b>0.02</b> | -0.15  | 1  | 3536.27         | 2.56   | 0.11        | -0.11  | 1  | 5.53            | 8.48 | <b>0.00</b> | 0.00  |
|                | hNE        | 3                   | 3.22  | 0.36        | 1                                   | 3430.81         | 0.16 | 0.69        | -0.10   | 1  | 7024.49         | 5.19   | <b>0.03</b> | -0.10  | 1  | 6705.45         | 4.60   | <b>0.04</b> | -0.10  | 1  | 2.55            | 3.62 | 0.06        | 0.00  |
|                | FLCk       | 3                   | 2.03  | 0.57        | 1                                   | 65473.80        | 3.26 | 0.08        | 1.46    | 1  | 7521.71         | 5.69   | <b>0.02</b> | -0.50  | 1  | 16151.62        | 15.17  | <b>0.00</b> | -0.73  | 1  | 0.09            | 0.12 | 0.74        | 0.00  |
|                | FLCA       | 3                   | 0.58  | 0.90        | 1                                   | 24783.89        | 1.19 | 0.28        | 1.44    | 1  | 4989.96         | 3.64   | 0.06        | -0.64  | 1  | 8103.20         | 6.61   | <b>0.01</b> | -0.85  | 1  | 0.00            | 0.01 | 0.94        | 0.00  |
|                | FLCk/FLCA  | 3                   | 1.60  | 0.66        | 1                                   | 115977.68       | 6.06 | <b>0.02</b> | 93.85   | 1  | 634.47          | 0.44   | 0.51        | -6.94  | 1  | 4387.85         | 3.37   | 0.07        | -18.40 | 1  | 0.02            | 0.02 | 0.88        | 0.04  |
|                | MAP(min)   | 3                   | 1.24  | 0.74        | 1                                   | 18441.19        | 0.88 | 0.35        | -1.79   | 1  | 95.92           | 0.07   | 0.79        | -0.08  | 1  | 411.75          | 0.28   | 0.60        | 0.18   | 1  | 1.79            | 2.70 | 0.10        | 0.01  |
|                | PUUV-N-IgG | 3                   | 7.37  | 0.06        | 1                                   | 51265.57        | 2.51 | 0.12        | -35.47  | 1  | 822.35          | 0.61   | 0.44        | 3.56   | 1  | 568.56          | 0.38   | 0.54        | 2.98   | 1  |                 |      |             |       |
|                | Sev(scale) | 3                   | 1.78  | 0.62        | 1                                   | 968.00          | 0.05 | 0.83        | -2.48   | 1  | 44345.69        | 46.89  | <b>0.00</b> | -10.92 | 1  | 71966.47        | 92.92  | <b>0.00</b> | -14.92 | 1  | 0.46            | 0.68 | 0.41        | -0.04 |
| Scaled dataset | Age        | 3                   | 6.17  | 0.10        | 1                                   | 0.00            | 0.10 | 0.75        | -0.04   | 1  | 0.45            | 4.90   | <b>0.03</b> | -0.40  | 1  | 0.82            | 10.74  | <b>0.00</b> | -0.54  | 1  | 0.06            | 1.18 | 0.28        | -0.15 |
|                | sex        | 3                   | 2.35  | 0.50        | 1                                   | 0.07            | 1.55 | 0.22        | 0.08    | 1  | 0.47            | 5.15   | <b>0.03</b> | 0.20   | 1  | 0.36            | 4.14   | <b>0.05</b> | 0.17   | 1  | 0.07            | 1.30 | 0.26        | 0.08  |
|                | D(t)       | 3                   | 0.88  | 0.83        | 1                                   | 0.01            | 0.24 | 0.63        | -0.09   | 1  | 1.43            | 20.09  | <b>0.00</b> | -1.01  | 1  | 0.84            | 11.11  | <b>0.00</b> | -0.78  | 1  | 0.06            | 1.15 | 0.29        | -0.21 |
|                | D(f)       | 3                   | 4.41  | 0.22        | 1                                   | 0.06            | 1.33 | 0.25        | 0.20    | 1  | 0.07            | 0.73   | 0.40        | 0.22   | 1  | 0.76            | 9.85   | <b>0.00</b> | 0.70   | 1  | 0.00            | 0.00 | 1.00        | 0.00  |
|                | FDBH       | 3                   | 2.51  | 0.47        | 1                                   | 0.01            | 0.32 | 0.58        | -0.09   | 1  | 0.74            | 7.40   | <b>0.01</b> | -0.62  | 1  | 1.11            | 12.08  | <b>0.00</b> | -0.76  | 1  | 0.01            | 0.21 | 0.65        | -0.08 |
|                | eGFR(min)  | 3                   | 2.78  | 0.43        | 1                                   | 0.03            | 0.63 | 0.43        | 0.08    | 1  |                 |        |             |        | 1  | 2.66            | 72.63  | <b>0.00</b> | 0.75   | 1  | 0.04            | 0.66 | 0.42        | 0.09  |
|                | eGFR       | 3                   | 3.82  | 0.28        | 1                                   | 0.02            | 0.54 | 0.46        | 0.08    | 1  | 2.88            | 72.63  | <b>0.00</b> | 0.82   | 1  |                 |        |             |        | 1  | 0.04            | 0.69 | 0.41        | 0.09  |
|                | WBC(max)   | 3                   | 1.15  | 0.76        | 1                                   | 0.00            | 0.05 | 0.82        | -0.03   | 1  | 0.97            | 12.02  | <b>0.00</b> | -0.64  | 1  | 0.79            | 10.30  | <b>0.00</b> | -0.57  | 1  | 0.00            | 0.01 | 0.92        | 0.02  |
|                | HCT(min)   | 3                   | 2.29  | 0.51        | 1                                   | 0.01            | 0.19 | 0.67        | -0.07   | 1  | 0.91            | 11.07  | <b>0.00</b> | 0.73   | 1  | 0.97            | 13.23  | <b>0.00</b> | 0.75   | 1  | 0.01            | 0.15 | 0.70        | 0.07  |
|                | HCT(max)   | 3                   | 3.38  | 0.34        | 1                                   | 0.02            | 0.37 | 0.55        | -0.10   | 1  | 0.27            | 2.79   | 0.10        | -0.39  | 1  | 0.07            | 0.72   | 0.40        | -0.20  | 1  | 0.02            | 0.35 | 0.56        | -0.11 |
|                | TC(min)    | 3                   | 6.36  | 0.10        | 1                                   | 0.13            | 2.94 | 0.09        | -0.20   | 1  | 0.01            | 0.09   | 0.77        | 0.05   | 1  | 0.01            | 0.12   | 0.73        | 0.06   | 1  | 0.01            | 0.17 | 0.68        | 0.05  |
|                | CRP(max)   | 3                   | 4.23  | 0.24        | 1                                   | 0.00            | 0.02 | 0.89        | 0.02    | 1  | 0.01            | 0.08   | 0.78        | 0.07   | 1  | 0.32            | 3.62   | 0.06        | 0.41   | 1  | 0.22            | 4.25 | <b>0.04</b> | -0.34 |
|                | NAb        | 3                   |       |             | 1                                   | 0.04            | 1.00 | 0.32        | -0.16   | 1  | 0.16            | 1.65   | 0.21        | -0.31  | 1  | 0.43            | 5.07   | <b>0.03</b> | -0.51  | 1  | 0.26            | 5.25 | <b>0.03</b> | 0.40  |
|                | VL         | 3                   | 7.01  | 0.07        | 1                                   |                 |      |             |         | 1  | 0.06            | 0.63   | 0.43        | 0.17   | 1  | 0.05            | 0.54   | 0.46        | 0.15   | 1  | 0.10            | 1.90 | 0.17        | -0.22 |
|                | IL-8       | 3                   | 2.01  | 0.57        | 1                                   | 0.15            | 3.55 | 0.07        | -0.27   | 1  | 0.05            | 0.51   | 0.48        | 0.16   | 1  | 0.01            | 0.15   | 0.70        | 0.08   | 1  | 0.01            | 0.11 | 0.75        | 0.05  |
|                | H3         | 3                   | 4.62  | 0.20        | 1                                   | 0.00            | 0.00 | 0.99        | 0.00    | 1  | 0.09            | 0.85   | 0.36        | -0.23  | 1  | 0.17            | 1.87   | 0.18        | -0.32  | 1  | 0.12            | 2.26 | 0.14        | -0.27 |
|                | cH3        | 3                   | 7.12  | 0.07        | 1                                   | 0.01            | 0.25 | 0.62        | -0.07   | 1  | 0.00            | 0.04   | 0.85        | -0.04  | 1  | 0.00            | 0.00   | 0.99        | 0.00   | 1  | 0.00            | 0.00 | 0.98        | 0.00  |
|                | MPO        | 3                   | 3.65  | 0.30        | 1                                   | 0.04            | 0.78 | 0.38        | 0.11    | 1  | 0.31            | 3.22   | 0.08        | -0.32  | 1  | 0.11            | 1.20   | 0.28        | -0.19  | 1  | 0.23            | 4.44 | <b>0.04</b> | -0.28 |
|                | hNE        | 3                   | 3.67  | 0.30        | 1                                   | 0.01            | 0.33 | 0.57        | -0.09   | 1  | 0.33            | 3.46   | 0.07        | -0.43  | 1  | 0.24            | 2.69   | 0.11        | -0.36  | 1  | 0.01            | 0.09 | 0.76        | -0.05 |
|                | FLCk       | 3                   | 3.57  | 0.31        | 1                                   | 0.15            | 3.44 | 0.07        | 0.18    | 1  | 0.30            | 3.16   | 0.08        | -0.26  | 1  | 0.82            | 10.71  | <b>0.00</b> | -0.43  | 1  | 0.00            | 0.01 | 0.91        | -0.01 |
|                | FLCA       | 3                   | 2.75  | 0.43        | 1                                   | 0.05            | 1.10 | 0.30        | 0.14    | 1  | 0.18            | 1.80   | 0.19        | -0.26  | 1  | 0.37            | 4.24   | <b>0.05</b> | -0.37  | 1  | 0.01            | 0.11 | 0.75        | -0.05 |
|                | FLCk/FLCA  | 3                   | 1.19  | 0.75        | 1                                   | 0.25            | 6.27 | <b>0.02</b> | 0.32    | 1  | 0.02            | 0.22   | 0.64        | -0.09  | 1  | 0.22            | 2.40   | 0.13        | -0.29  | 1  | 0.00            | 0.03 | 0.86        | -0.03 |
|                | MAP(min)   | 3                   | 5.33  | 0.15        | 1                                   | 0.03            | 0.65 | 0.42        | -0.12   | 1  | 0.09            | 0.89   | 0.35        | -0.21  | 1  | 0.08            | 0.84   | 0.36        | -0.20  | 1  | 0.32            | 6.49 | <b>0.01</b> | 0.40  |
|                | PUUV-N-IgG | 3                   | 10.74 | <b>0.01</b> | 1                                   | 0.08            | 1.90 | 0.17        | -0.18   | 1  | 0.07            | 0.66   | 0.42        | 0.16   | 1  | 0.06            | 0.69   | 0.41        | 0.16   | 1  |                 |      |             |       |
|                | Sev(scale) | 3                   | 3.60  | 0.31        | 1                                   | 0.01            | 0.20 | 0.66        | -0.06   | 1  | 0.83            | 9.89   | <b>0.00</b> | -0.57  | 1  | 1.69            | 29.40  | <b>0.00</b> | -0.81  | 1  | 0.00            | 0.02 | 0.90        | -0.02 |

<sup>1</sup>MS=Mean square

**Table S5.** Mixed model-analysis. The NAb was divided into 4 categories  $\text{NAb} \leq 320 = 29$ ,  $\text{NAb} = 640 = 38$ ,  $\text{NAb} = 1280 = 28$ ,  $\text{NAb} \geq 2560 = 21$ . VL had 3 categories:  $\text{VL} < 10$ ,  $10 \leq \text{VL} < 80$  and  $\text{VL} \geq 80$ . The 3 categories of PUUV-N-IgG were  $< 0.15$ ,  $0.15 \leq \text{PUUV-N-IgG} < 0.9$  and  $\text{PUUV-N-IgG} \geq 0.9$ . In the analyses, we utilized mixed models with eGFR, HCT, WBC, TC or CRP as dependent variables, and time, the categorized variable, and the interaction of time and the categorized variable serving as the independent variables. There were 54 patients' observations in the time series.

|                   | Variable | N nonmiss | Fit Statistics | time*NAb <sup>4</sup>        |              | time <sup>1</sup> |                  | NAb <sup>1</sup>        |        |
|-------------------|----------|-----------|----------------|------------------------------|--------------|-------------------|------------------|-------------------------|--------|
|                   |          |           | AIC            | F Value                      | Pr > F       | F Value           | Pr > F           | F Value                 | Pr > F |
| <b>NAb</b>        | eGFR     | 195       | 1659,6         | 0,86                         | 0,565        | 1,37              | 0,254            | 1,80                    | 0,158  |
|                   | HCT      | 191       | -609,5         | 0,59                         | 0,802        | 48,35             | <b>&lt;.0001</b> | 0,89                    | 0,451  |
|                   | WBC      | 191       | 886,8          | 0,70                         | 0,705        | 5,28              | <b>0,002</b>     | 0,55                    | 0,649  |
|                   | TC       | 191       | 1742,7         | 2,95                         | <b>0,003</b> | 50,60             | <b>&lt;.0001</b> | 2,58                    | 0,064  |
|                   | CRP      | 190       | 1679,2         | 0,72                         | 0,691        | 25,31             | <b>&lt;.0001</b> | 2,03                    | 0,122  |
|                   | Variable | N nonmiss | Fit Statistics | time*VL <sup>3</sup>         |              | time <sup>1</sup> |                  | VL <sup>2</sup>         |        |
|                   |          |           | AIC            | F Value                      | Pr > F       | F Value           | Pr > F           | F Value                 | Pr > F |
| <b>VL</b>         | eGFR     | 195       | 1688,5         | 1,12                         | 0,352        | 1,78              | 0,153            | 1,70                    | 0,194  |
|                   | HCT      | 191       | -638,4         | 1,61                         | 0,149        | 49,54             | <b>&lt;.0001</b> | 1,08                    | 0,348  |
|                   | WBC      | 191       | 891,0          | 1,94                         | 0,078        | 5,03              | <b>0,003</b>     | 0,77                    | 0,468  |
|                   | TC       | 191       | 1796,2         | 0,81                         | 0,562        | 44,97             | <b>&lt;.0001</b> | 0,74                    | 0,482  |
|                   | CRP      | 190       | 1709,8         | 1,52                         | 0,178        | 28,79             | <b>&lt;.0001</b> | 0,08                    | 0,920  |
|                   | Variable | N nonmiss | Fit Statistics | time*PUUV-N-IgG <sup>3</sup> |              | time <sup>1</sup> |                  | PUUV-N-IgG <sup>2</sup> |        |
|                   |          |           | AIC            | F Value                      | Pr > F       | F Value           | Pr > F           | F Value                 | Pr > F |
| <b>PUUV-N-IgG</b> | eGFR     | 195       | 1695,4         | 0,27                         | 0,952        | 1,89              | 0,134            | 0,38                    | 0,686  |
|                   | HCT      | 191       | -629,5         | 0,36                         | 0,903        | 41,03             | <b>&lt;.0001</b> | <b>0,04</b>             | 0,964  |
|                   | WBC      | 191       | 900,7          | 0,08                         | 0,998        | 3,97              | <b>0,010</b>     | 1,04                    | 0,362  |
|                   | TC       | 191       | 1773,7         | 5,01                         | <b>0,000</b> | 52,19             | <b>&lt;.0001</b> | 0,69                    | 0,505  |
|                   | CRP      | 190       | 1713,4         | 0,31                         | 0,933        | 25,64             | <b>&lt;.0001</b> | 1,50                    | 0,233  |

Number of all observations in all models 216.

<sup>1</sup>DF=3, <sup>2</sup>DF=2, <sup>3</sup>DF=6, <sup>4</sup>DF=9.

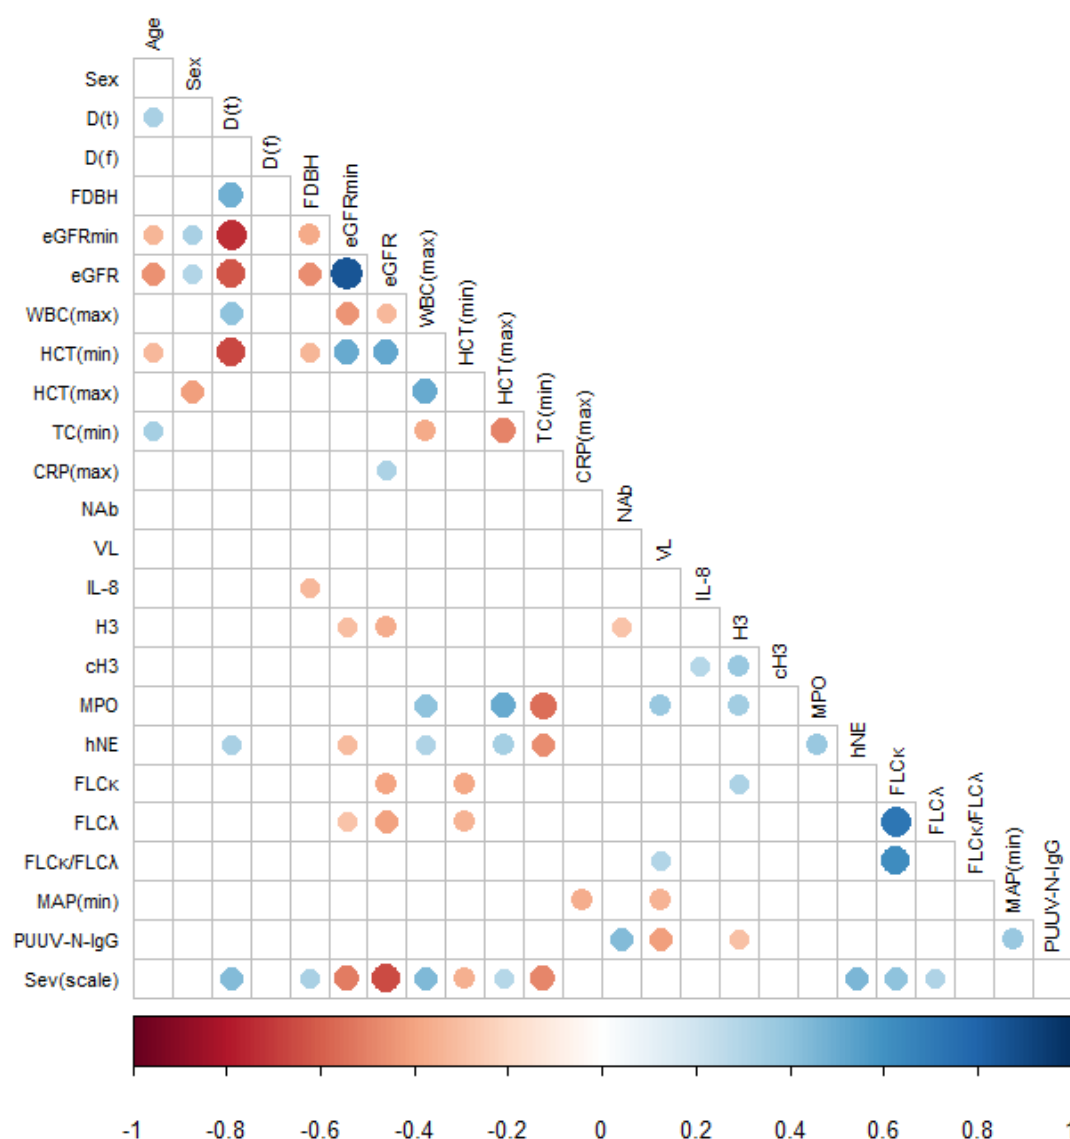

**Figure S1.** Spearman correlation plot of scaled dataset where missing data points in variables were excluded pairwise. Variable abbreviations are D(t) = Overall disease duration, D(F) = overall duration of fever, FDBH = Fever days before hospitalization, eGFR = estimated glomerular filtration rate, WBC = white blood cell count, HCT = Hematocrit, TC = thrombocyte count, CRP = C-reactive protein, NAb = PUUV neutralizing antibodies, VL = PUUV viral load, IL-8 = Interleukin-8, H3 = Histone H3, cH3 = Citrullinated histone H3, MPO = Myeloperoxidase, hNE = Neutrophil elastase, FLC $\kappa$  = Free light chain  $\kappa$ , FLC $\lambda$  = Free light chain  $\lambda$ , MAP = mean arterial pressure, Sev(scale) = Severity scale. The maximum or minimum values during the hospitalization are indicated as min or max, respectively and all other parameters are measured from 1st day of hospitalization. Only significant correlations at  $p \leq 0.05$  are shown and the size of the dots are equivalent to the significance.

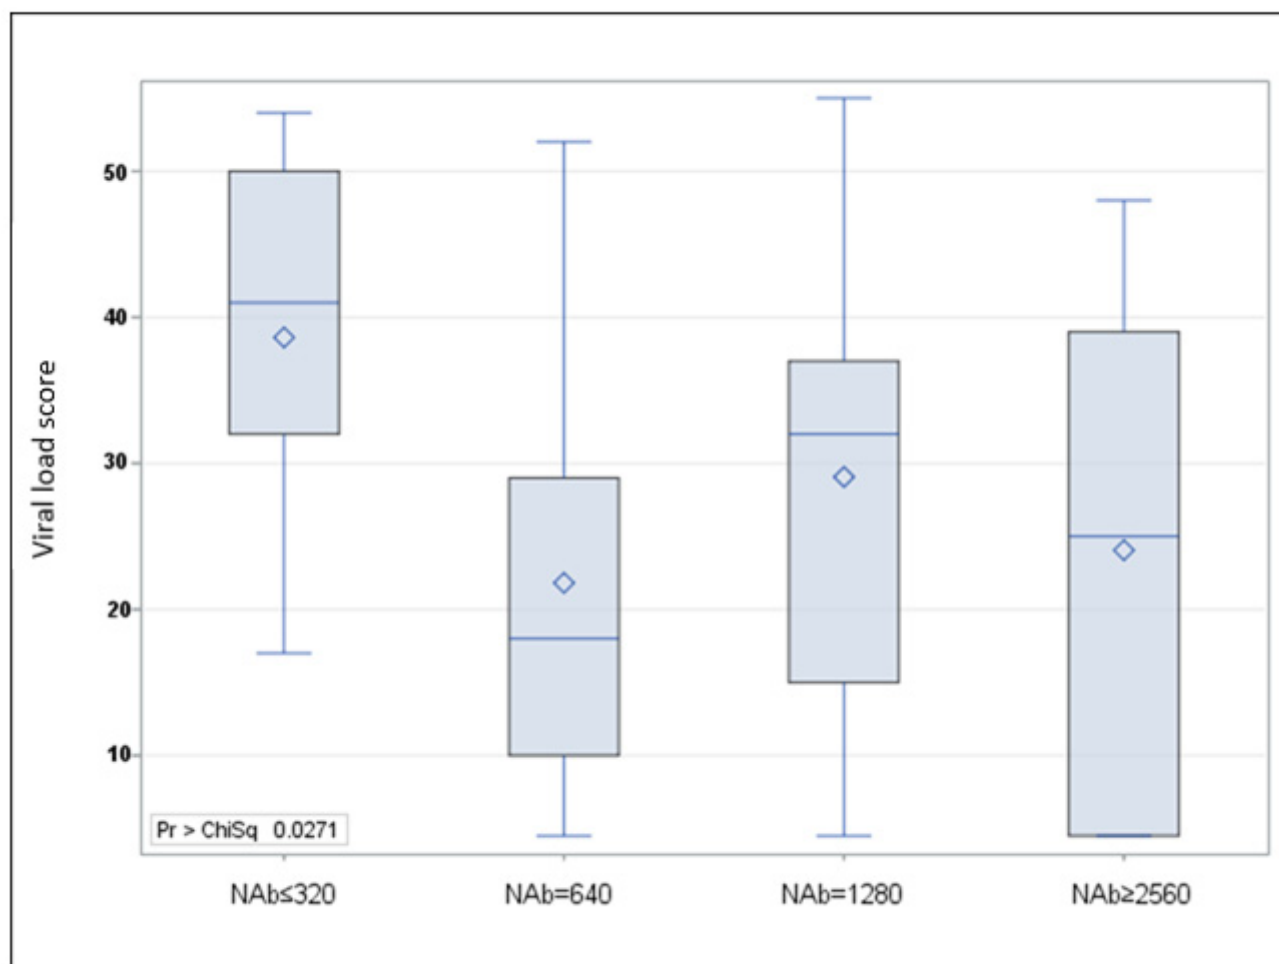

**Figure S2.** Distribution of Wilcoxon scores for VL in four groups of Nab. The group sizes are as follows: NAb ≤ 320 = 29, NAb = 640 = 38, NAb = 1280 = 28, NAb ≥ 2560 = 21

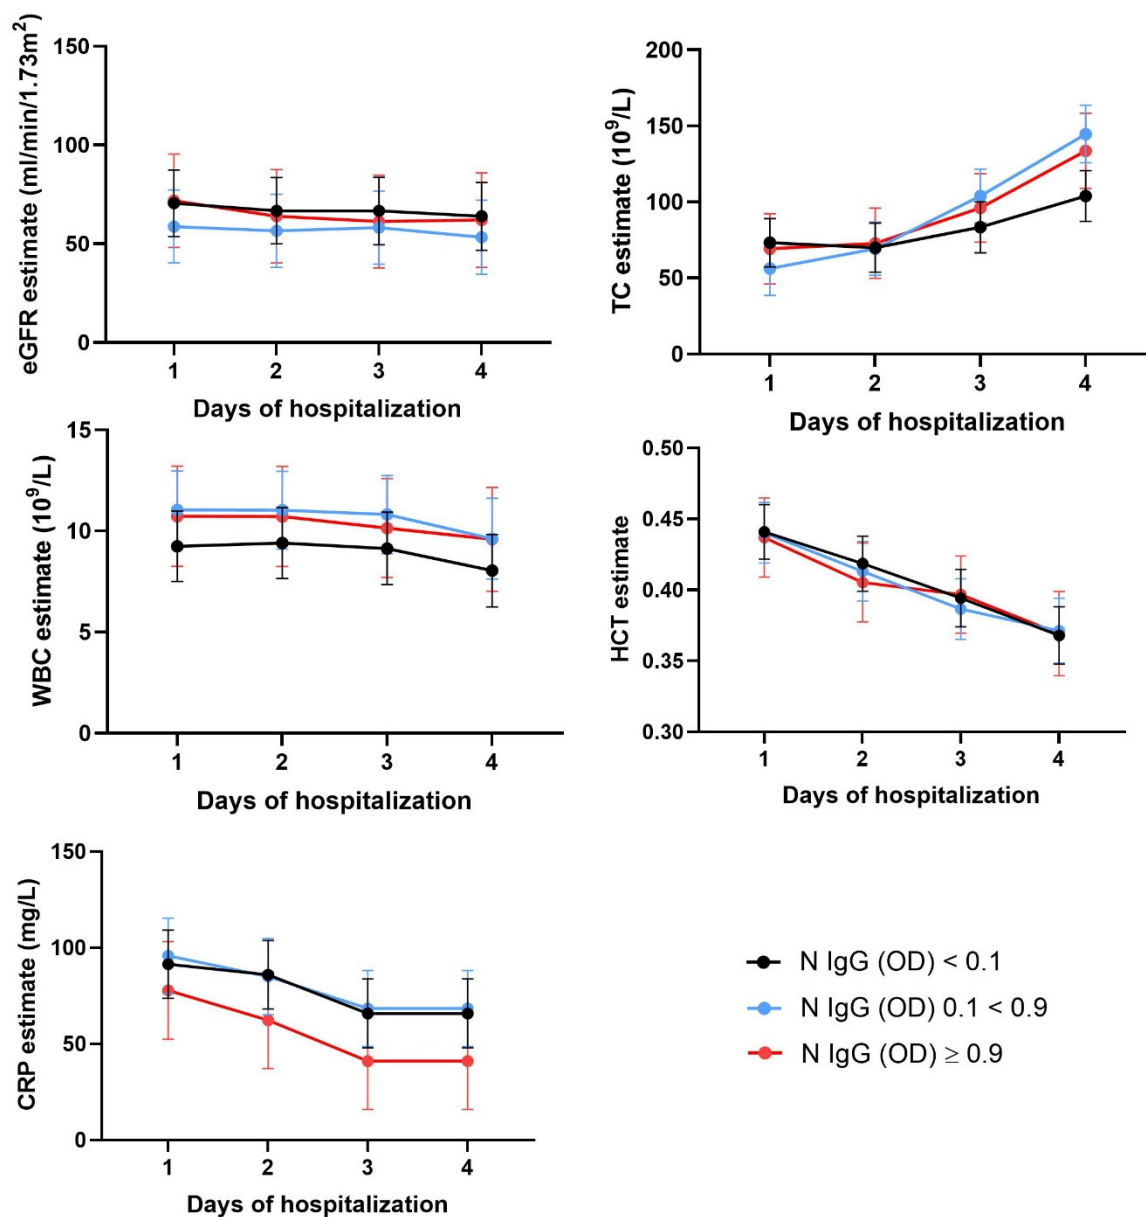

**Figure S3.** Time series graphs showing the impact of different categories of PUUV N-IgG at 1st day of hospitalization on eGFR, TC, WBC, HCT and CRP. The variables eGFR, TC, WBC, HCT and CRP were followed over time (the first 4 days of hospitalization) and reported as mean estimates from the mixed model analysis. The error bars indicate upper and lower limits of the estimates.

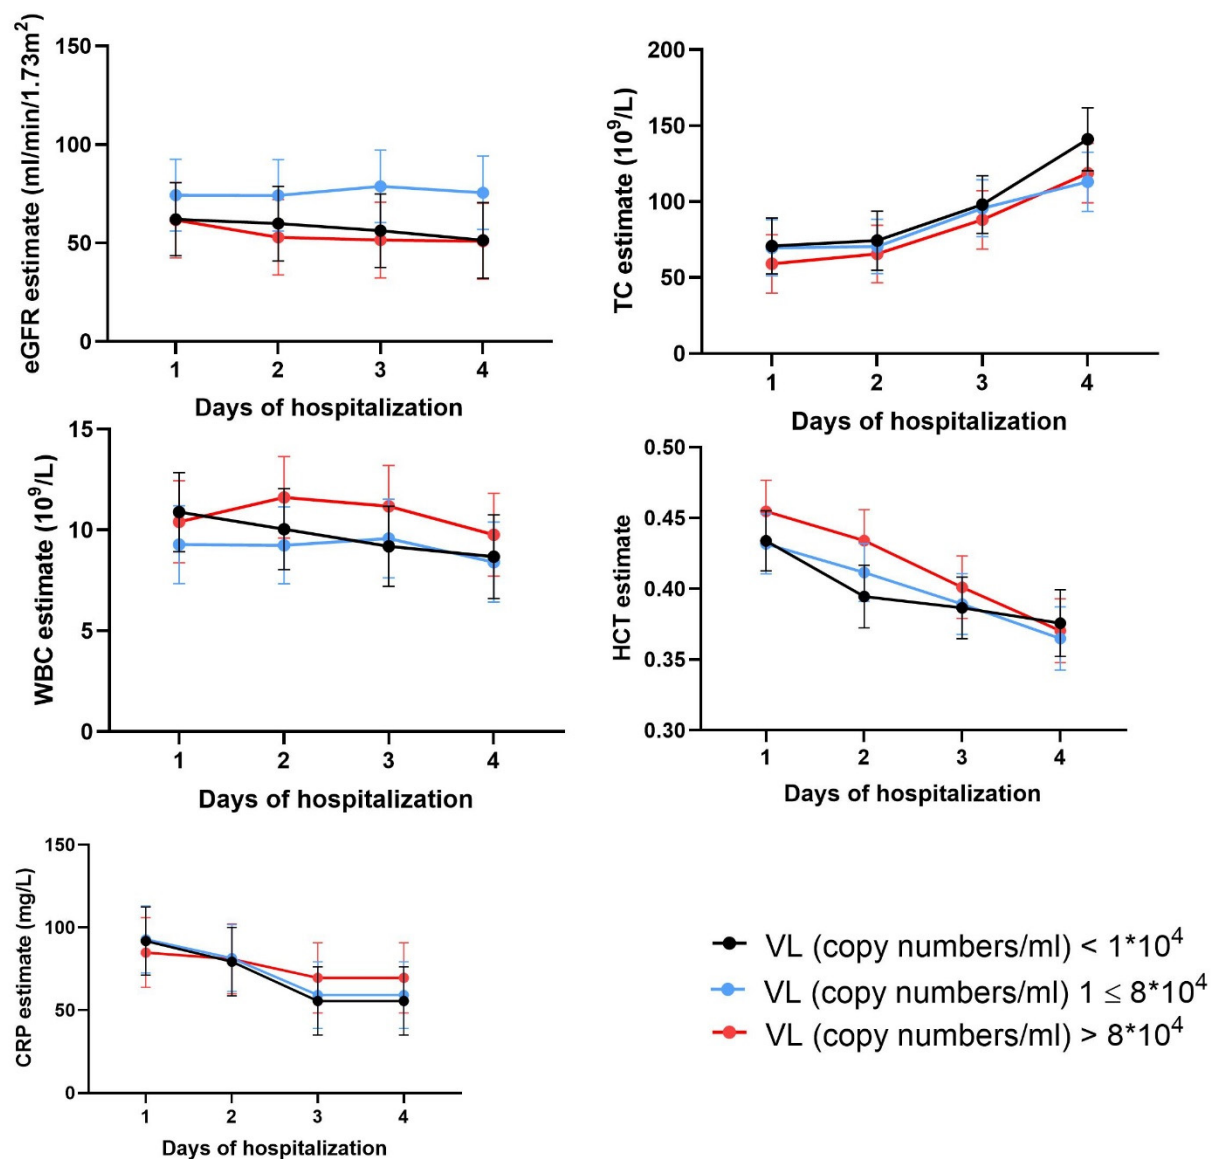

**Figure S4.** Time series graphs showing the impact of different categories of PUUV VL at 1st day of hospitalization on eGFR, TC, WBC, HCT and CRP. The variables eGFR, TC, WBC, HCT and CRP were followed over time (the first 4 days of hospitalization) and reported as mean estimates from the mixed model analysis. The error bars indicate upper and lower limits of the estimates.



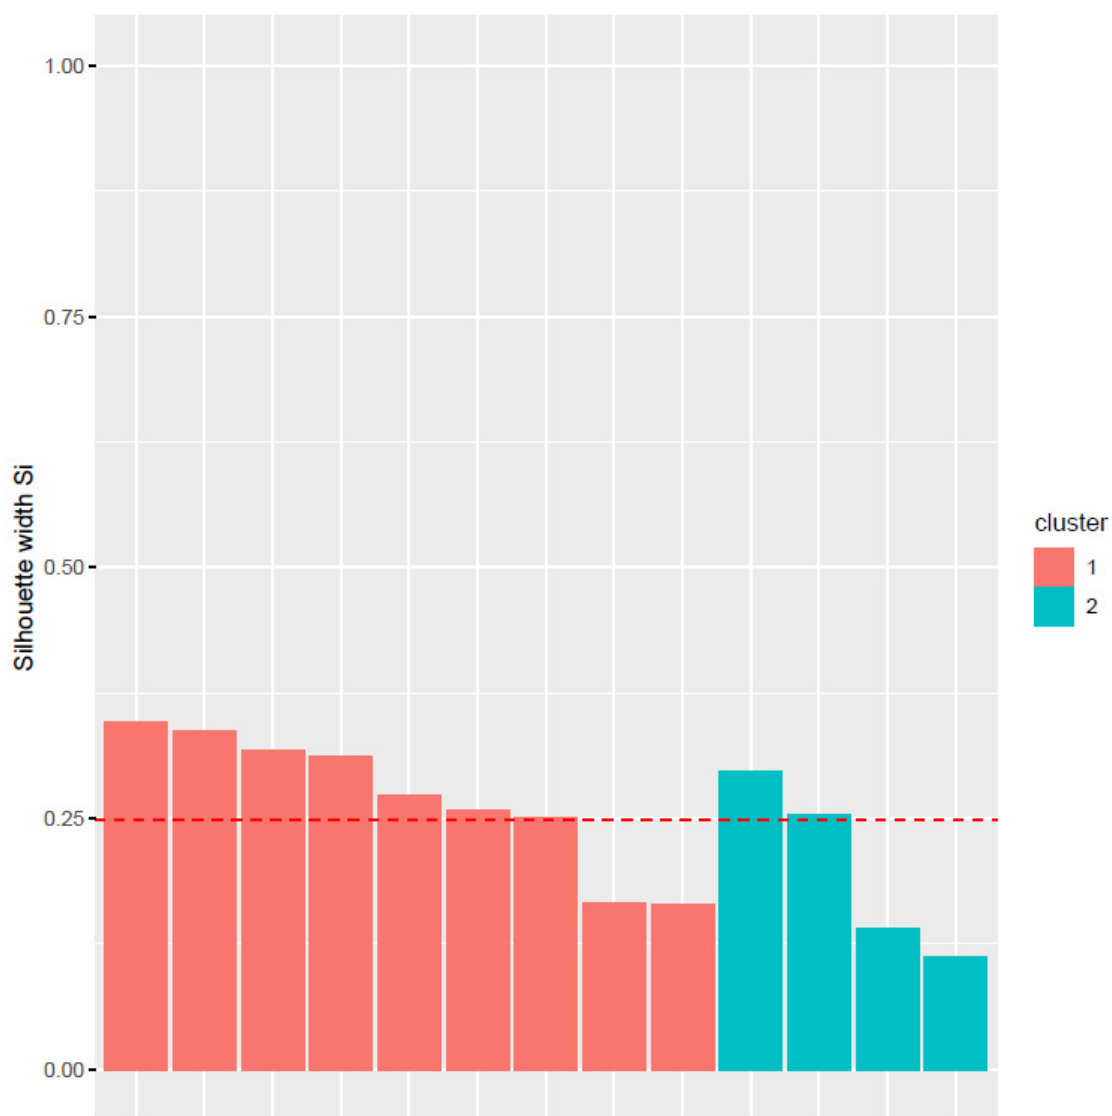

**Figure S5.** Silhouette plot of hierarchical cluster analysis. Average silhouette width 0.25. Cluster 1: 9 clusters, average silhouette width 0.27. Cluster 2: 4 clusters, average silhouette width 0.20. The clustering with the highest average silhouette width is considered to present the most appropriate clustering of the data points.
